# Supplementary material for: Physicians’ attitudes on the implementation of an antimicrobial stewardship program in Lebanese hospitals
Source: PubMed Central journal article supplement — Pharm Pract (Granada). 2021 Feb 16;19(1):2192. doi: 10.18549/PharmPract.2021.1.2192 (PMC7939116; doi:10.18549/pharmpract.2021.1.2192), 2021-02-16
Supplement: pharmpract-19-2192-suppl.pdf [file pharmpract-19-2192-suppl.pdf]

### Online Appendix. Questionnaire tabulation

| Dimension                                                                                                                       | Question                                                                                                                                 |
|---------------------------------------------------------------------------------------------------------------------------------|------------------------------------------------------------------------------------------------------------------------------------------|
| Knowledge                                                                                                                       | Are you familiar with the concept of an Antimicrobial Stewardship Program (ASP)                                                          |
|                                                                                                                                 | Which of the following Antimicrobial Stewardship Program components is currently in place in your Hospital                               |
|                                                                                                                                 | 1- Infectious Disease physician and/or Infectious Disease pharmacist rounding                                                            |
|                                                                                                                                 | 2- Audit--and--feedback for some antibiotics prescribed within your hospital                                                             |
|                                                                                                                                 | 3- Antimicrobials restricted to Infectious Disease consultants                                                                           |
| Practices                                                                                                                       | 4- Time-sensitive automatic stop orders for specified antibiotic Prescriptions                                                           |
|                                                                                                                                 | 5- Specific interventions for optimal use of antibiotics to treat Community-Acquired Pneumonia                                           |
|                                                                                                                                 | 6- Specific interventions for optimal use of antibiotics to treat Urinary Tract Infection                                                |
|                                                                                                                                 | 7- Specific interventions for optimal use of antibiotics for Surgical Prophylaxis                                                        |
|                                                                                                                                 | 8- Specific interventions for empiric treatment of intraabdominal infections                                                             |
|                                                                                                                                 | 9- Specific interventions for empiric treatment of skin and soft tissues infections                                                      |
|                                                                                                                                 | Are there plans in your institution to implement an ASP                                                                                  |
|                                                                                                                                 | How long has the ASP been present in your institution                                                                                    |
|                                                                                                                                 | The stewardship team in your hospital is made up of (check all that apply)                                                               |
|                                                                                                                                 | 1- Infectious Disease Physician                                                                                                          |
| 2- ASP Pharmacist                                                                                                               |                                                                                                                                          |
| 3- Infection Control officer                                                                                                    |                                                                                                                                          |
| 4- Other                                                                                                                        |                                                                                                                                          |
| Attitude                                                                                                                        | How often do you have interaction with the ASP in your hospital                                                                          |
|                                                                                                                                 | 1- Once or twice per week                                                                                                                |
|                                                                                                                                 | 2- 3 to 4 times per week                                                                                                                 |
|                                                                                                                                 | 3- > 4 times per week                                                                                                                    |
|                                                                                                                                 | Do you have regular educational programs on the appropriate use of antimicrobials for hospital medical, nursing and other relevant staff |
|                                                                                                                                 | Is your hospital's microbiology Lab developing and monitoring local antibiograms to assess local resistance and susceptibility patterns  |
|                                                                                                                                 | Please rate the level of agreement to the following statements                                                                           |
|                                                                                                                                 | 1- I feel that my patients benefit/would benefit having an ASP in place.                                                                 |
|                                                                                                                                 | 2- I feel that time spent interacting with the ASP physician and/or pharmacist is/would be an efficient use of my time.                  |
|                                                                                                                                 | 3- I feel that an ASP increases/would increase my knowledge of appropriate antimicrobial use.                                            |
| 4- I feel that an ASP affects/would affect my autonomy in a negative way.                                                       |                                                                                                                                          |
| 5- The necessity of gaining approval for restricted antibiotics makes the team think more carefully about antibiotic choice.    |                                                                                                                                          |
| 6- The physician caring for the patient is in the best position to know what the best antibiotic treatment is for that patient. |                                                                                                                                          |
| 7- Antibiotic guidelines and antibiotic committee are an obstacle more than a help to clinical care                             |                                                                                                                                          |
| 8- A computer approval program would be a preferable system for approval of restricted antibiotics.                             |                                                                                                                                          |
| 9- A faxed or written approval program would be a preferable system for approval of restricted antibiotics.                     |                                                                                                                                          |
| Usefulness                                                                                                                      | Please rate the following methods of interaction with the ASP as to their usefulness                                                     |
|                                                                                                                                 | 1- Prospective audit and feedback                                                                                                        |
|                                                                                                                                 | 2- Antibiotic rounds with ASP physician/pharmacist                                                                                       |
|                                                                                                                                 | 3- Standard meeting time on rounds                                                                                                       |
|                                                                                                                                 | 4- Written feedback in progress notes on patient chart                                                                                   |
|                                                                                                                                 | 5- Written suggestions in doctors' orders                                                                                                |
| 6- Verbal feedback (outside of formal rounds).                                                                                  |                                                                                                                                          |
| Decision tools                                                                                                                  | Yes/No                                                                                                                                   |
|                                                                                                                                 | 1- Would you prefer to have more guidance from Infectious Disease experts regarding your antimicrobial prescribing                       |
|                                                                                                                                 | 2- The development of local guidelines is/would be more useful than the international ones                                               |
|                                                                                                                                 | 3- Local resistance data is an important information for optimal antibiotic use.                                                         |
|                                                                                                                                 | 4- National resistance data is an important information for optimal antibiotic use                                                       |
| 5- Availability of rapid microbiological diagnostic tests is important for antibiotic treatment decision                        |                                                                                                                                          |

| Dimension          | Question                                                                                                                                                                                                                                                                                                                                                                                                                                                                                                                                                                                                                                                                                                                                                                                                                                                                                                                |
|--------------------|-------------------------------------------------------------------------------------------------------------------------------------------------------------------------------------------------------------------------------------------------------------------------------------------------------------------------------------------------------------------------------------------------------------------------------------------------------------------------------------------------------------------------------------------------------------------------------------------------------------------------------------------------------------------------------------------------------------------------------------------------------------------------------------------------------------------------------------------------------------------------------------------------------------------------|
|                    | <p>Do you feel that your use of antimicrobials has changed significantly over the past couple of years</p> <p>In what way (s) has your use of antimicrobials changed? (check all that apply):</p> <ol style="list-style-type: none"> <li>1- Less empiric therapy</li> <li>2- More empiric therapy</li> <li>3- More targeted therapy</li> <li>4- Longer durations of therapy</li> <li>5- Shorter durations of therapy</li> <li>6- Avoiding specific drugs or classes of antibiotics</li> </ol>                                                                                                                                                                                                                                                                                                                                                                                                                           |
| Prescribing change | <p>Which of the following factors have contributed to this change? (check all that apply)</p> <ol style="list-style-type: none"> <li>1- Fellow/resident approach to antimicrobials prescribing</li> <li>2- Pharmacists approach to antimicrobials prescribing</li> <li>3- Greater consciousness of resistance</li> <li>4- Budget constraints</li> <li>5- Infectious Disease consults</li> <li>6- Articles in medical literature</li> <li>7- Conferences</li> <li>8- Visiting speakers</li> <li>9- Antimicrobial Stewardship Program</li> </ol>                                                                                                                                                                                                                                                                                                                                                                          |
| Barriers           | <p>Select all the barriers that may hinder initiating or sustaining an antibiotic control program? (check all that apply)</p> <ol style="list-style-type: none"> <li>1- Infectious Disease physician shortages</li> <li>2- Lack of leadership to promote antimicrobial stewardship</li> <li>3- Lack of support from the medical staff</li> <li>4- Lack of support from administration or department heads</li> <li>5- Lack of training and education in antimicrobial use</li> <li>6- Lack of financial incentives to the Infectious Disease physician and the pharmacist to initiate the program</li> <li>7- Minimal support of the ministry of public health and absence of regulation</li> <li>8- Absence of national approved guidelines</li> <li>9- Physicians' compliance with hospital guidelines and antimicrobial prescribing policies</li> <li>10- Insufficient evidence my hospital would benefit</li> </ol> |
